# Supplementary material for: CO2 sequestration in ultramafic ores: impacts on the efficiency of nickel beneficiation
Source: Royal Society of Chemistry journal article supplement (doi:10.1039/d3gc02078a), 2023-09-27
Supplement: d3gc02078a1.pdf [file d3gc02078a1.pdf]

## Supplementary Information

### CO<sub>2</sub> sequestration in ultramafic ore: Impact on the efficiency of nickel beneficiation

Shaihroz Khan<sup>a,b\*</sup>, Mohammad Shoaib<sup>c</sup>, Lindsey K. Fiddes<sup>d</sup>, Omar Bashir Wani<sup>a,e</sup>, Erin Rae Bobicki<sup>a,e\*</sup>

<sup>a</sup>Department of Chemical Engineering and Applied Chemistry, University of Toronto (UofT), 200 College Street, Toronto, Ontario, M5S 3E5, Canada

<sup>b</sup>BASF SE APR Division, Carl Bosch Strasse 38, Ludwigshafen, Rhineland-Palatinate, 67063, Germany

<sup>c</sup>Earth and Environmental Sciences, Lawrence Berkeley National Laboratory, 1 Cyclotron Road, Berkeley, California, 94720, United States

<sup>d</sup>Microscopy Imaging Lab, Temerty Faculty of Medicine, University of Toronto (UofT), 1 King's College Circle, Medical Sciences Building, Toronto, Ontario, M5S 1A8, Canada

<sup>e</sup>Department of Chemical and Materials Engineering, University of Alberta, Donadeo Innovation Centre for Engineering, 9211-116 Street NW, Edmonton, Alberta, T6G 1H9, Canada

\* Corresponding Authors

Corresponding Authors E-mail:

[shaihroz.khan@utoronto.ca](mailto:shaihroz.khan@utoronto.ca)

[erin.bobicki@utoronto.ca](mailto:erin.bobicki@utoronto.ca)

Number of pages: 3

Number of figures: 3

Number of table: 1

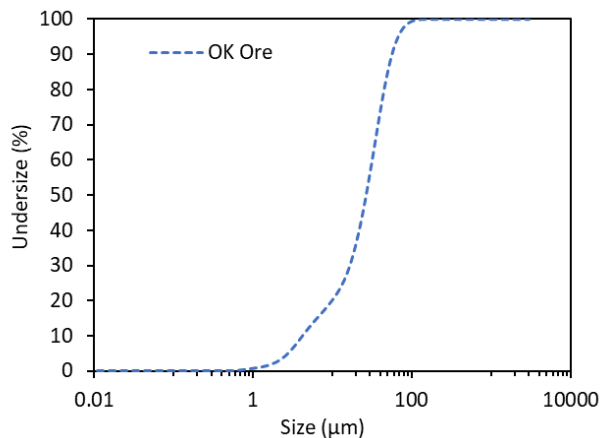

Supplementary Figure 1: Particle Size Distribution of OK Ore.

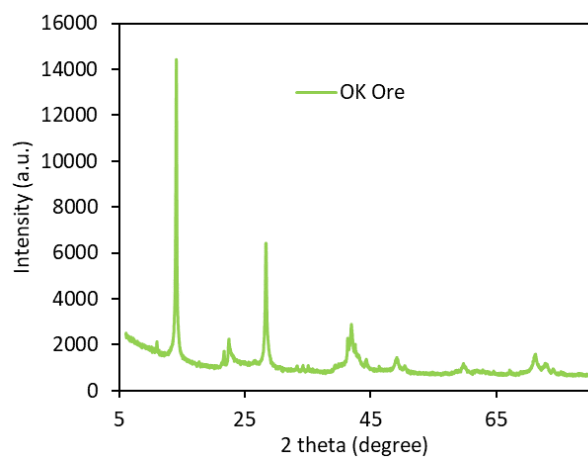

Supplementary Figure 2: X-Ray Diffraction pattern of OK Ore.

### CO<sub>2</sub> Uptake/ tonne Ni Calculations:

The amount of CO<sub>2</sub> captured (g)/100 g of ore was mentioned in the graphs. Now with the ore containing 0.22% Ni as per the ICP analysis, the amount of CO<sub>2</sub> captured per tonne of Ni would be,

- a. The CO<sub>2</sub> uptake per 100 g of ore (sample CN1-1, Fig 1a).  
 $U_{\text{ore}} = 5.19 \text{ g}/100\text{g ore}$
- b. The amount of nickel in 100 g of ore.  
 $0.22\% \text{ of } 100 \text{ g} = 0.22/100 \times 100 \text{ g} = 0.22 \text{ g of Ni.}$
- c. The CO<sub>2</sub> uptake per gram of nickel in 100 g of ore.  
 $U_{\text{Ni}} = 0.22 U_{\text{ore}} = 5.19/0.22 = 23.59 \text{ g CO}_2/\text{g Ni}$

d. Calculate the CO<sub>2</sub> uptake per tonne of nickel.

$$U_{\text{Ni,tonne}} = U_{\text{Ni}} \times 1,000,000 = 23.59 \times 1,000,000 = 23,590,000 \text{ g CO}_2/\text{ tonne Ni}$$

$$= 23.59 \text{ tonnes/ tonne Ni}$$

Similarly, the CO<sub>2</sub> uptake/ tonne Ni is calculated for other samples (Supplementary Fig. 3 a & b).

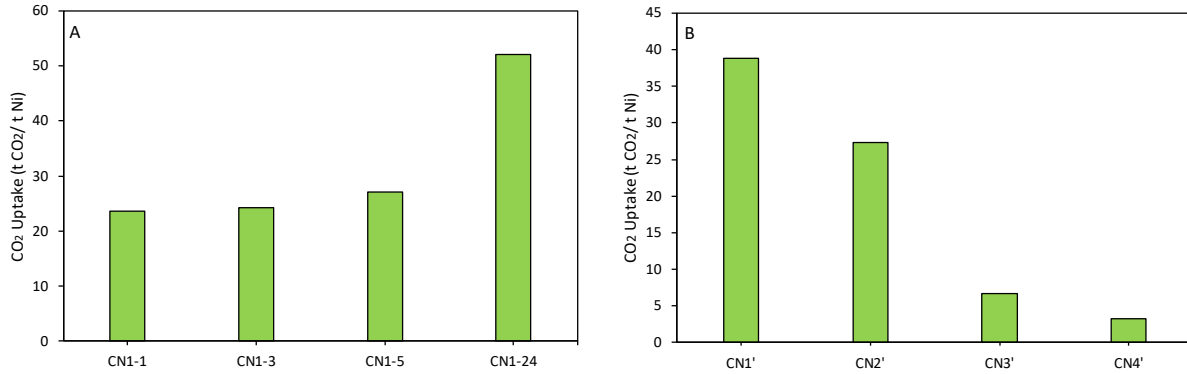

Supplementary Figure 3: CO<sub>2</sub> uptake/ tonne Ni for samples in Fig. 1 a (A) & b (B).

Characterization of samples for carbonate formation: The results from TIC (Fig. 1 a & b) showed 15.87% conversion for CN1' and 21.29% conversion for CN1. The results from both the XRD (Table S1) and TIC are very close to each other, and it indicates the consistency of results across two different characterization techniques.

Table S1: Semi-quantitative % Mineral Compositions - Rietveld Refinement

| Sample Description/Minerals identified by XRD | Semi-quantitative % mineral compositions |
|-----------------------------------------------|------------------------------------------|
| <b>CN1'</b>                                   |                                          |
| Clinochlore                                   | 41.51                                    |
| Lizardite                                     | 35.82                                    |
| Magnesite                                     | 14.04                                    |
| Talc                                          | 6.45                                     |
| Magnetite                                     | 2.19                                     |
| <b>CN1</b>                                    |                                          |
| Clinochlore                                   | 38.25                                    |
| Lizardite                                     | 33.39                                    |
| Magnesite                                     | 20.65                                    |
| Talc                                          | 4.84                                     |
| Magnetite                                     | 2.86                                     |
